# Supplementary material for: Isolation of a Human Betaretrovirus from Patients with Primary Biliary Cholangitis
Source: MDPI journal article supplement (doi:10.3390/v14050886), 2022-04-24
Supplement: s1 [file s1]

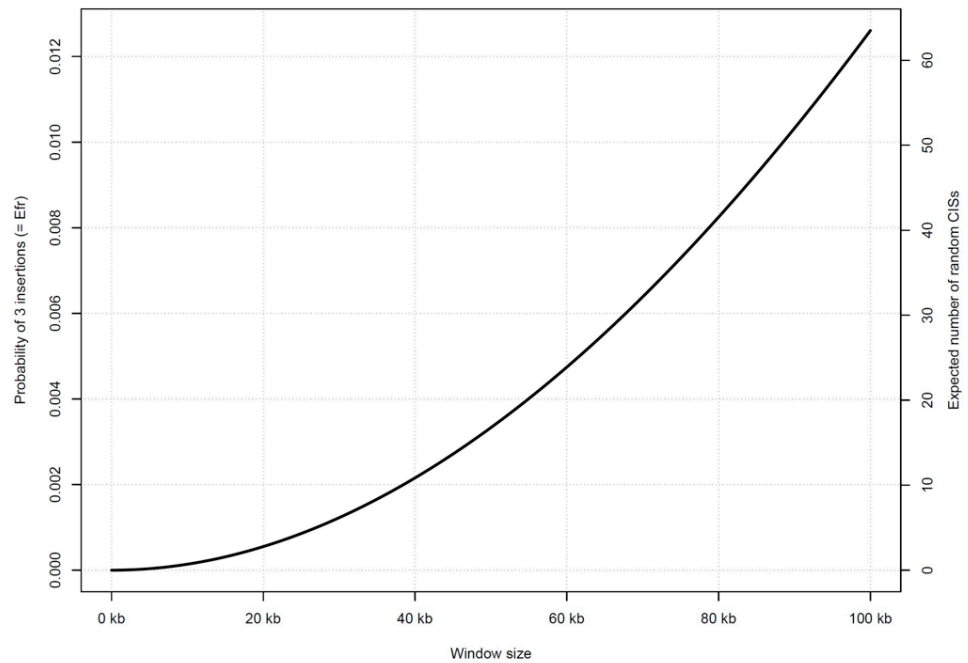

**Figure S1.** Calculation of common integration sites (CIS) genomic distance. The presence of CIS within a specific genomic window was calculated in our dataset containing 5036 proviral insertions, where the expected fraction (Efr) of three insertions provided an 88kb window size ( $p = 0.01$ ) based on methods described by Mikkers et al. [58].

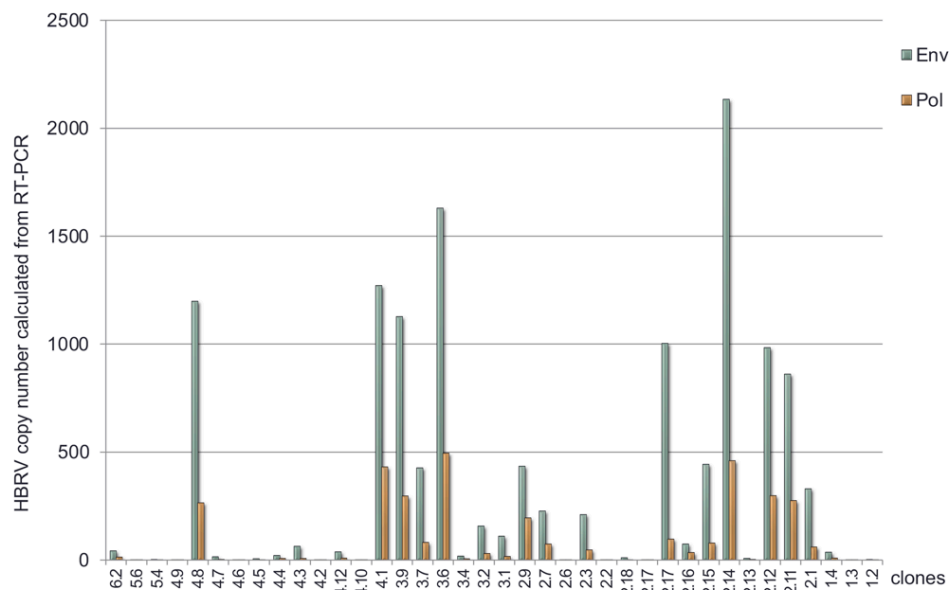

**Figure S2.** RT-PCR of HBRV RNA in Hs578T cells after the third round of subcloning. Cells with HBRV Env CT values  $< 28.1$  equivalent to a copy number  $> 10^3$  per sample were used for virus isolation [calibrated by dilution of RSV:MMTV plasmid].



**Table S1.** Representative cancer-associated genes at HBRV in vitro integration clusters (visually represented in Figure 4A).

| Chromosome location <sup>a</sup> | Unique integration sites (+/-) <sup>b</sup> | First integration on site | Last integration on site | Cluster Window size (bp) | Genes in region | Gene <sup>c</sup> | Sanger <sup>d</sup> | COSMIC <sup>e</sup> | CCG <sup>f</sup> | Cancer Driver (mice) <sup>g,[91]</sup> | Relevant cancer type  |
|----------------------------------|---------------------------------------------|---------------------------|--------------------------|--------------------------|-----------------|-------------------|---------------------|---------------------|------------------|----------------------------------------|-----------------------|
| 3q28-29                          | 12 (7/5)                                    | 191,671,53                | 3192,688,053             | 1,016,700                | 4               | PYDC2 (+)         | N                   | N                   | N                | N                                      | N                     |
|                                  |                                             |                           |                          |                          |                 | FGF12 (-)         | N                   | N                   | N                | N                                      | N                     |
|                                  |                                             |                           |                          |                          |                 | MB21D2 (-)        | N                   | Y; Tier 2           | N                | Y                                      | Liver[82]             |
|                                  |                                             |                           |                          |                          |                 | HRASLS (+)        | N                   | N                   | N                | Y                                      | N                     |
| 5q32                             | 8 (4/4)                                     | 147,054,77                | 7148,096,029             | 1,041,252                | 6               | JAKMIP2 (-)       | N                   | N                   | N                | N                                      | N                     |
|                                  |                                             |                           |                          |                          |                 | SPINK1 (-)        | N                   | N                   | N                | N                                      | Liver[74]             |
|                                  |                                             |                           |                          |                          |                 | SH3TC2 (-)        | N                   | N                   | Y                | Y                                      | N                     |
|                                  |                                             |                           |                          |                          |                 | HTR4 (-)          | N                   | N                   | Y                | Y                                      | N                     |
|                                  |                                             |                           |                          |                          |                 | ADRB2 (+)         | N                   | N                   | N                | N                                      | Breast[92]            |
| 8q22.3                           | 7 (3/4)                                     | 106,051,24                | 8106,855,522             | 803,698                  | 4               | LRP12 (-)         | N                   | N                   | Y                | Y                                      | N                     |
|                                  |                                             |                           |                          |                          |                 | ZFPM2 (-)         | N                   | N                   | Y                | Y                                      | N                     |
|                                  |                                             |                           |                          |                          |                 | ZFPM2-AS1 (+)     | N                   | NL <sup>h</sup>     | N                | N                                      | Liver[75], Breast[76] |
|                                  |                                             |                           |                          |                          |                 | OXR1 (+)          | N                   | N                   | N                | N                                      |                       |
| 8q24.22                          | 11 (5/6)                                    | 132,584,51                | 5133,541,074             | 956,523                  | 6               | ADCY8 (-)         | N                   | N                   | N                | N                                      | Breast[93]            |
|                                  |                                             |                           |                          |                          |                 | EFRA3A (+)        | N                   | NL                  | N                | N                                      | N                     |
|                                  |                                             |                           |                          |                          |                 | OC90 (-)          | N                   | N                   | N                | N                                      | Breast[94]            |
|                                  |                                             |                           |                          |                          |                 | HHLA1 (-)         | N                   | N                   | N                | N                                      | N                     |
|                                  |                                             |                           |                          |                          |                 | KCNQ3 (-)         | N                   | N                   | N                | N                                      | N                     |
|                                  |                                             |                           |                          |                          |                 | HPYR (-)          | N                   | NL                  | N                | N                                      | N                     |
| 8q24.22-q24.23                   | 7 (4/3)                                     | 135,292,61                | 5135,846,103             | 553,542                  | 6               | ST3GAL1 (-)       | N                   | N                   | N                | N                                      | N                     |
|                                  |                                             |                           |                          |                          |                 | ZFAT (-)          | N                   | N                   | N                | N                                      | N                     |
|                                  |                                             |                           |                          |                          |                 | ZFAT-AS1 (+)      | N                   | NL                  | N                | N                                      | N                     |
|                                  |                                             |                           |                          |                          |                 | MIR30B (-)        | N                   | N                   | N                | N                                      | Liver[77], Breast[78] |
|                                  |                                             |                           |                          |                          |                 | MIR30D (-)        | N                   | NL                  | N                | N                                      | N                     |
|                                  |                                             |                           |                          |                          |                 | KHDRBS3 (+)       | N                   | N                   | N                | N                                      | N                     |
| 9q31.1-q31.2                     | 5 (0/5)                                     | 107,351,49                | 5108,340,002             | 988,453                  | 9               | OR13C8 (+)        | N                   | N                   | N                | N                                      | N                     |
|                                  |                                             |                           |                          |                          |                 | OR13C5 (-)        | N                   | N                   | N                | N                                      | N                     |
|                                  |                                             |                           |                          |                          |                 | OR13C2 (-)        | N                   | N                   | N                | N                                      | N                     |
|                                  |                                             |                           |                          |                          |                 | OR13C9 (-)        | N                   | N                   | N                | N                                      | N                     |
|                                  |                                             |                           |                          |                          |                 | OR13D1 (+)        | N                   | N                   | N                | N                                      | N                     |
|                                  |                                             |                           |                          |                          |                 | FSD1L (+)         | N                   | N                   | N                | N                                      | N                     |
|                                  |                                             |                           |                          |                          |                 | FKTN (+)          | N                   | N                   | N                | N                                      | N                     |

|             |         |             |           |           |    | TAL2 (+)    | Y | Y; Tier 1 | Y | Y | Blood[95]  |
|-------------|---------|-------------|-----------|-----------|----|-------------|---|-----------|---|---|------------|
| 9q31.2      | 7 (1/6) | 108,526,910 | 9,370,774 | 843,807   | 3  | TMEM38B (+) | N | N         | Y | Y | N          |
| 11q14.3-q21 | 6 (1/5) | 92,741,519  | 3,768,781 | 1,027,264 | 10 | MTNR1B (+)  | N | N         | N | N | N          |
|             |         |             |           |           |    | SLC36A4 (-) | N | N         | N | N | N          |
|             |         |             |           |           |    | CCDC67 (+)  | N | N         | N | N | Liver[96]  |
|             |         |             |           |           |    | SMCO4 (-)   | N | N         | N | N | N          |
|             |         |             |           |           |    | MED17 (+)   | N | N         | N | N | Breast[97] |
|             |         |             |           |           |    | VSTM5 (-)   | N | N         | N | N | N          |
|             |         |             |           |           |    | HEPHL1 (+)  | N | N         | Y | Y | N          |
|             |         |             |           |           |    | FOLR4 (+)   | N | N         | N | N | N          |
| Xq11.1      | 5 (0/5) | 585690285   | 579313    | 10,285    | 1  | ZXDA (-)    | N | N         | N | N | N          |
|             | 9 (0/9) | 616822726   | 1723406   | 41,134    | 1  | SPIN4 (-)   | N | N         | N | N | N          |

a. Genome build: GRCh37.p13; b. Integration orientation: (+) forward, (-) reverse; c. Gene orientation: as in b.; d. Sanger.; e. COSMIC (Cancer Gene Census: Tier 1 – well-documented activity relevant to cancer; Tier 2 – strong indication of a role in cancer); f. CCGD; g. Insertional mutagenesis screen in mice [91]; h. NL – not listed.
